# Supplementary material
Source: HighWire-hosted journal article supplement (https://ijgc.bmj.com/content/ijgc-2019-000994)
Supplement: inline-supplementary-material-2 [file inline-supplementary-material-2.pdf]

INTERNATIONAL JOURNAL OF  
**GYNECOLOGICAL CANCER**

**Comparison of laparoscopic and open  
radical hysterectomy in cervical cancer  
patients with tumor size  $\leq 2$ cm**

**Co-authors:** Xu Chen, Na Zhao, Piao-Piao Ye, Jia-Hua Chen, Xing-Wei Nan, Hong-Qin Zhao, Kai Zhou, Yu-Yang Zhang, Ji-Sen Xue, Hai-Hong Zhou, Hui-Ling Shang, Han-Xiao Zhu, van der Merwe Leanne, Xiao-Jian Yan

**Laparoscopic radical hysterectomy was associated with worse disease-free survival for stage IB1 (FIGO 2009) cervical cancer patients with tumor size  $\leq 2$  cm compared to open radical hysterectomy.**

Laparoscopy was an independent poor prognostic factor for disease-free survival with 4.64 times hazard ratio.

In patients with non-squamous cell carcinoma or with grade II-III, laparoscopic surgery had a worse disease-free survival compared to the open surgery group.

Read the full article by searching the DOI: **10.1136/ijgc-2019-000994**
